# Supplementary material for: Identification of drugs associated with reduced severity of COVID-19 – a case-control study in a large population
Source: eLife. 2021 Jul 27;10:e68165. doi: 10.7554/eLife.68165 (PMC8321549; doi:10.7554/eLife.68165)
Supplement: Supplementary file 1. — Suppl Tab 1 Multivariable logistic regression for hospitalization status according to ethnicity and medication consumption in Cohort 1. Suppl Tab 2 Multivariable logistic regression for hospitalization status according to ethnicity and medication consumption in Cohort 2. Figure supplements Forest plot showing association between drug use and hospitalization risk in each of the cohorts, divided by body mass index (BMI) category. [file elife-68165-supp1.xlsx]

## Sheet: regression Cohort 1
Supplementary Table 1: Multivariable logistic regression for hospitalization status according to ethnicity and medication consumption in Cohort 1
	Dependent variable:
	Model
	Cohort 1
Ethnicity Ultra-Orthodox	1.954
	(1.759, 2.170)***
	p = 0.000
Ethnicity Arab	4.239
	(3.918, 4.586)***
	p = 0.000
C10AA07 Rosuvastatin	0.74
	(0.654, 0.838)***
	p = 0.00001
C10AX09 Ezetimibe	0.58
	(0.453, 0.744)***
	p = 0.00002
A16AX30 Ubiquinone 10	0.203
	(0.089, 0.461)***
	p = 0.0002
C01BC04 Flecainide	0.293
	(0.136, 0.634)***
	p = 0.002
J07AL02 Pneumococcus, purified polysacharides antigen conjugated	0.613
	(0.389, 0.967)**
	p = 0.036
C09BA05 Ramipril-Hydrochlorothiazide CD	0.738
	(0.608, 0.895)***
	p = 0.003
A10BD07 Metformin and Sitagliptin CD	0.839
	(0.725, 0.972)**
	p = 0.019
C10AA03 Pravastatin	0.68
	(0.505, 0.915)**
	p = 0.011
N06AB10 Escitalopram	0.925
	(0.795, 1.076)
	p = 0.314
M01AC01 Piroxicam	0.598
	(0.388, 0.924)**
	p = 0.021
C09CA06 Candesartan	0.835
	(0.639, 1.092)
	p = 0.188
M05BA07 Risedronic Acid	0.754
	(0.564, 1.007)*
	p = 0.056
G04CB02 Dutasteride	0.696
	(0.472, 1.026)*
	p = 0.067
A11CC05 Cholecalciferol	1.006
	(0.916, 1.104)
	p = 0.904
C09AA08 Cilazapril	0.62
	(0.373, 1.033)*
	p = 0.067
G04BE08 Tadalafil	0.727
	(0.491, 1.077)
	p = 0.113
S01ED61 Timolol-Travoprost CD	0.485
	(0.233, 1.010)*
	p = 0.054
A10BH01 Sitagliptin	0.745
	(0.513, 1.080)
	p = 0.120
J07BB02 Influenza, inactivated, split virus or surface antigen	0.866
	(0.764, 0.982)**
	p = 0.025
N06DX02 Ginkgo folium	0.305
	(0.073, 1.277)
	p = 0.105
A12CC04 Magnesium Citrate	0.805
	(0.548, 1.180)
	p = 0.267
A10BK01 Dapagliflozin	0.89
	(0.618, 1.280)
	p = 0.530
Note:	*p<0.1; **p<0.05; ***p<0.01

## Sheet: regression Cohort 2
Supplementary Table 2: Multivariable logistic regression for hospitalization status according to ethnicity and medication consumption in Cohort 2
	Dependent variable:
	Model
	Cohort 2
Ethnicity Ultra-Orthodox	1.199
	(1.075, 1.339)***
	p = 0.002
Ethnicity Arab	2.468
	(2.291, 2.659)***
	p = 0.000
C10AA07 Rosuvastatin	0.78
	(0.685, 0.889)***
	p = 0.0002
C10AX09 Ezetimibe	0.727
	(0.570, 0.926)***
	p = 0.010
J07AL02 Pneumococcus, purified polysacharides antigen conjugated	0.528
	(0.324, 0.863)**
	p = 0.011
M05BA07 Risedronic Acid	0.622
	(0.446, 0.868)***
	p = 0.006
A16AX30 Ubiquinone 10	0.446
	(0.219, 0.911)**
	p = 0.027
N06AB10 Escitalopram	0.864
	(0.738, 1.012)*
	p = 0.071
C09BA05 Ramipril-Hydrochlorothiazide CD	0.679
	(0.546, 0.844)***
	p = 0.0005
C01BC04 Flecainide	0.341
	(0.151, 0.768)***
	p = 0.010
S01XA40 Hydroxypropylmethylcellulose	0.665
	(0.499, 0.886)***
	p = 0.006
A11CC05 Cholecalciferol	0.965
	(0.875, 1.064)
	p = 0.477
B01AE07 Dabigatran Etexilate	0.691
	(0.472, 1.013)*
	p = 0.058
C09AA08 Cilazapril	0.51
	(0.288, 0.903)**
	p = 0.021
N02CC04 Rizatriptan	0.147
	(0.019, 1.131)*
	p = 0.066
A12CC04 Magnesium Citrate	0.76
	(0.508, 1.138)
	p = 0.184
S01KA01 Hyaluronic Acid	0.363
	(0.139, 0.948)**
	p = 0.039
C09DB01 Valsartan-Amlodipine CD	0.783
	(0.665, 0.921)***
	p = 0.004
A10BD07 Metformin and Sitagliptin CD	0.851
	(0.724, 0.999)**
	p = 0.049
B03BA51 VIT.B12 COMBINATIONS CD	0.656
	(0.434, 0.993)**
	p = 0.047
G03CA03 Estradiol	0.743
	(0.434, 1.272)
	p = 0.280
C09DA01 Losartan-Hydrochlorothiazide CD	0.77
	(0.620, 0.956)**
	p = 0.018
S01ED01 Timolol	0.632
	(0.381, 1.051)*
	p = 0.077
G04BD12 Mirabegron	0.673
	(0.412, 1.097)
	p = 0.112
Z01CE01 Eye Care Wipes	0.364
	(0.107, 1.237)
	p = 0.106
N06AX12 Bupropion	0.462
	(0.187, 1.141)*
	p = 0.095
N06BA04 Methylphenidate	0.623
	(0.285, 1.362)
	p = 0.236
A12AX05 Calcium-Zinc CD	0
	(0.000, Inf)
	p = 0.983
A11JC02 Multivitamins for Ocular Use	0.661
	(0.417, 1.049)*
	p = 0.079
Note:	*p<0.1; **p<0.05; ***p<0.01

## Sheet: BMI subgroup analyses
Supplementary Figure 1: Forest plot showing association between drug use and hospitalization risk in each of the cohorts, divided by BMI category
